# Supplementary material for: 'Roly-poly toy' motion during pollen exudation promotes rapid pollen adhesion in rice
Source: Research Square preprint supplement (doi:10.21203/rs.3.rs-4273294/v1), 2024-05-23
Supplement: Supplementary file 1 [file 99dc6c3d85126700f86c9fa6.xlsx]

## Sheet: Table S1
Table S1. List of metabolites detected in pollen exudate, mature pollen grains, and stigma papillae in rice using picoPPESI-MS in negativ ion mode.
		Ion type detected	Theoretical m/za			Signal intensity (%)							Frequency of detection
				Pollen exudate		Pollen		Stigma		ANOVA		Pollen exudate	Pollen	Stigma
Organic acids	Malic acid	[M-H]-	133.014	1.05587	b	96.7016	a	100	a	***		++++	++++	++++
	3-Phosphoglyceric acid	[M-H]-	184.986	-	b	0.922178	a	0.00514747	b	***		-	++++	+
	Phosphoenolpyruvic acid	[M-H]-	166.975	-		0.0998711		-				-	+++	-
	Pyruvic acid	[M-H]-	87.0088	1.56089	ab	2.5755	a	0.291761	b	**		++++	++++	++++
	Citric acid	[M-H]-	191.02	2.25934	b	14.1021	a	3.21809	b	*		++++	++++	++++
	2-Oxoglutaric acid	[M-H]-	145.014	0.729928	b	11.9835	a	0.684425	b	***		++++	++++	++++
	Succinic acid	[M-H]-	117.019	0.261054	b	8.23451	a	2.45557	b	***		++++	++++	++++
	Fumaric acid	[M-H]-	115.004	0.303735	c	2.85577	a	1.51701	b	***		++++	++++	++++
	Oxaloacetic acid	[M-H]-	130.999	-		0.055648		-				-	+++	-
	Lactic acid	[M-H]-	89.0244	0.9684		1.63293		0.979154		0.362		++++	++++	++++
	Quinic acid	[M-H]-	191.056	0.173263		2.09776		0.812898		0.1053		++++	++++	++++
	Shikimic acid	[M-H]-	173.046	0.00747945		0.567061		0.0308532		0.1064		++	++	++
	Phosphoric acid	[M-H]-	96.9696	0.799318	b	42.4585	a	1.24631	b	**		++++	++++	+++
	Pyrophosphate(PPi)	[M-H]-	176.936	-		0.0263058		-				-	++	-
Redox-related	Ascorbic acid	[M-H]-	175.025	77.7833	a	24.9723	b	5.56846	b	***		++++	++++	++++
	Monodehydroascorbic acid	[M-H]-	174.017	1.05028	a	0.611147	a	0.0932616	b	***		++++	++++	++
	Dehydroascorbic acid	[M-H]-	173.009	0.25323	b	0.863109	a	0.419718	ab	*		++++	++++	++++
	Glutathione	[M-H]-	306.077	2.03304		3.31227		0.632799		0.0608		++++	++++	++++
	Glutathione, oxidized	[M-H]-	611.145	0.0181018		0.00160156		0.0148265		0.4295		++	+	+
Amino acids	Glycine	[M-H]-	74.0248	1.1664		0.0418663		0.00780757		0.2792		++	+++	+
	Alanine	[M-H]-	88.0404	0.0822741	b	0.764531	a	0.113076	b	**		+++	++++	++
	Serine	[M-H]-	104.035	0.0391405		0.354653		0.592522		0.1113		++++	++++	++++
	Proline	[M-H]-	114.056	20.9949	ab	37.3155	a	0.0704183	b	**		++++	++++	+
	Valine	[M-H]-	116.072	0.0341664	ab	0.121534	a	0.0211286	b	*		+++	+++	++
	Threonine	[M-H]-	118.051	0.0413911		0.384652		0.0269532		0.1625		+++	+++	++
	Cysteine	[M-H]-	120.012	-		0.0232029		-		0.135		-	++	-
	Leucine, Isoleucine	[M-H]-	130.087	0.0241978		0.209113		0.0290742		0.2185		+++	+++	++
	Asparagin	[M-H]-	131.046	0.0236319		1.3121		2.55139		0.1622		++	+++	++++
	Asparatic acid	[M-H]-	132.03	2.43105	b	20.3729	a	0.917796	b	**		++++	++++	++++
	Glutamine	[M-H]-	145.062	0.438818	b	4.37563	a	1.46638	b	***		++++	++++	++++
	Lysine	[M-H]-	145.098	-		0.0142978		-		0.4123		-	+	-
	Glutamic acid	[M-H]-	146.046	3.95911		8.99435		3.07883		0.4247		++++	++++	++++
	Methionine	[M-H]-	148.044	0.00368664		0.0593224		-		0.1987		+	++	-
	Histidine	[M-H]-	154.062	-	b	0.913643	a	-	b	**		-	++++	-
	Phenylalanine	[M-H]-	164.072	0.0596692		0.198466		-		0.1695		++++	+++	-
	Tyrosine	[M-H]-	180.067	-	a	0.773746	a	0.0221695	a	*		-	+++	++
	Tryptophan	[M-H]-	203.083	-		0.0411311		-		0.0687		-	+++	-
	GABA	[M-H]-	102.056	0.0745298		1.11083		0.0660557		0.0751		+++	++++	+
Carbohydrate	Hex-H	[M-H]-	179.056	0.476822	b	9.35408	a	1.06058	b	***		++++	++++	++++
	Hex+Cl	[M+Cl]-	215.033	44.6786	a	34.2398	a	3.6253	b	***		++++	++++	++++
	Hex2-H	[M-H]-	341.109	3.16471	b	29.1763	a	2.12888	b	***		++++	++++	++++
	Hex2+Cl	[M+Cl]-	377.086	98.3776	a	28.9282	b	9.77231	b	***		++++	++++	++++
	Hex3-H	[M-H]-	503.162	-		0.0926671		-		0.0525		-	+++	-
	Hex3+C	[M+Cl]-	539.138	0.00927029		0.0279935		0.0141755		0.7791		++	+	+
	Hex4-H	[M-H]-	665.215	-		0.00191629		0.00945946		0.4439		-	+	+
	Hex4+C	[M+Cl]-	701.191	-		0.00325376		-		0.5246		-	+	-
	(Hex2)2-H	[M-H]-	683.225	0.705901	b	6.00871	a	0.069184	b	**		++++	++++	++
	(Hex2)2-H	[M+Cl]-	719.202	6.68528	a	1.48066	b	0.0791749	b	***		++++	++++	++
	Sedoheptulose et al.	[M-H]-	209.067	0.0246807	b	1.59466	a	0.306384	b	***		++++	++++	++++
	Sedoheptulose et al.	[M+Cl]-	245.043	0.127213		2.01411		0.430004		0.2558		++++	++++	++++
	HexP	[M-H]-	259.022	-	b	9.10398	a	0.374014	b	***		-	++++	+++
	HexP2	[M-H]-	338.989	-		0.403287		-		***		-	++++	-
	HexP3	[M-H]-	418.955	0.00134093		0.00964869		-		0.2218		+	++	-
	HexP4	[M-H]-	498.921	-		0.0141502		-		0.5246		-	+	-
	Pentose	[M-H]-	149.046	0.0448918		0.751688		0.426674		0.0803		++++	++++	++++
	Pentose	[M+Cl]-	185.022	0.0794108	a	0.0101556	b	0.012776	b	***		++++	++	+
	Pentose2	[M-H]-	281.088	-		0.67823		0.0743355		0.0657		-	+++	++
	Pentose3	[M+Cl]-	449.107	-		0.0407889		-		0.4892		-	+	-
	Gluconic acid or Galactonate	[M-H]-	195.051	0.635824	b	4.8821	a	0.768764	b	***		++++	++++	++++
	Arabinonic acid at al.	[M-H]-	165.041	0.267123	b	5.89048	a	1.55981	b	***		++++	++++	++++
Cell wall-related	Uridine diphosphate (UDP)	[M-H]-	402.995	-		0.164744		-		0.1103		-	+++	-
	UDP-glucose	[M-H]-	565.048	-	b	1.85921	a	0.0442943	b	***		-	++++	++
	UDP-D-Xylose, UDP-L-arabinose	[M-H]-	535.037	-		0.0749417		-		***		-	+++	-
	Cinnamic acid	[M-H]-	147.045	0.0022523		-		-		0.2667		+	-	-
	ferulic acid	[M-H]-	193.051	-		0.0100732		-		0.3587		-	+	-
	D-Erythrose 4-phosphate	[M-H]-	199.001	0.00383065	b	0.313147	a	0.024339	b	***		+	++++	++
	3-Dehydroquinic acid	[M-H]-	189.041	0.0539559		0.0342725		-		0.0533		++++	++	-
	p-Coumaric acid	[M-H]-	163.04	-		0.115249		0.0495325		0.3282		-	++	++
	Coniferyl alcohol	[M-H]-	179.071	-		0.0388885		-		0.2711		-	+	-
	Coumaryl-alcohol	[M-H]-	149.061	0.00137097		0.0110978		0.0069795		0.5985		+	++	+
	Coniferin	[M+Cl]-	377.101	-		0.00145246		-		0.5246		-	+	-
	p-coumaryl alcohol 4-glucoside	[M-H]-	311.114	-		0.059378		-		0.2881		-	++	-
	Chalcone	[M-H]-	207.082	-		-		0.00175562		0.338		-	-	+
Pectin-related	D-Glucuronic acid	[M-H]-	193.035	0.181231		1.02138		0.0355469		0.105		++++	+++	++
	a-L-Rhamnose	[M-H]-	163.061	0.0983956	b	4.58015	a	0.656793	b	**		+++	++++	+++
	Kdo	[M-H]-	237.062	0.260088	b	1.79752	a	0.819527	ab	*		++++	++++	++++
	Dihydroxyacetone (glycerone)	[M-H]-	89.0244	0.9684		1.63293		0.785356		0.1385		++++	++++	++++
	Sulfite	[M-H]-	80.9652	-		0.048822		0.005466		0.4082		-	++	+
	Sulfuric acid	[M-H]-	96.9601	0.0490695	b	9.02174	a	0.144627	b	**		++++	++++	+++
Cystaine related	Monochlorobimane	[M-H]-	225.044	0.00165323		0.00106235		-		0.6031		+	+	-
	Thiocysteine (cysteine persulfide)	[M-H]-	151.984	-		-		0.00294549		0.338		-	-	+
	Glycerol	[M-H]-	91.0401	0.00114631	b	0.0292454	a	-	b	*		+	+++	-
	Adenine	[M-H]-	134.047	-	b	0.265963	a	0.0685087	b	**		-	+++	++
	ATP	[M-H]-	505.988	-		0.0515096		-		0.0935		-	++	-
	ADP	[M-H]-	426.022	0.00382488	b	0.993292	a	0.0175785	b	*		+	++++	+
	AMP	[M-H]-	346.056	-	b	1.38035	a	0.0431849	b	**		-	++++	+
	ADP-glucose	[M-H]-	588.075	-		0.00503309		-		0.5246		-	+	-
	nicotianamine	[M-H]-	302.136	-		0.0918686		0.193063		0.0952		-	++	+++
Flavonol glycoside	Unknown Metabolite 1	[M-H]-	431.098	-	b	0.0123119	b	3.29671	a	***		-	+	++++
	Unknown Metabolite 2	[M-H]-	447.093	-	b	0.0891302	b	25.0968	a	***		-	+++	++++
	Unknown Metabolite 2	[M+Cl]-	483.07	-	b	0.13817	b	5.96889	a	***		-	+	++++
	Unknown Metabolite 3	[M-H]-	465.104	0.00285714	b	0.182605	b	2.2772	a	***		+	++	++++
	Unknown Metabolite 3	[M+Cl]-	501.08	-	b	0.00963869	b	1.48981	a	***		-	+	++++
	Unknown Metabolite 4	[M-H]-	563.141	-	b	0.456461	b	3.50658	a	***		-	++	++++
	Unknown Metabolite 5	[M-H]-	579.135	-	b	-	b	5.52615	a	***		-	-	++++
	Unknown Metabolite 5	[M+Cl]-	615.112	-	b	0.0110395	b	3.30532	a	***		-	+	++++
Lipids	Oleic Acid	[M-H]-	281.249	1.01004		1.07151		0.0740796		0.5738		++++	+++	+
	Palmitic acid	[M-H]-	255.233	2.00618		2.87096		0.512583		0.1879		++++	++++	+++
	Stearic acid	[M-H]-	283.264	7.01178	a	2.19601	ab	0.458123	b	*		++++	++++	+++
	Myristic acid	[M-H]-	227.202	0.614614		0.645073		0.18714		0.5556		++	++++	++
	Linolenic Acid	[M-H]-	277.217	0.338126		0.172552		-		0.1842		+++	+++	-
	Arachidic Acid	[M-H]-	311.296	0.587393	a	0.0338768	b	-	b	*		+++	++	-
	Linoleic acid	[M-H]-	279.233	0.200689		0.192683		-		0.5355		++	++	-
	palmitoleic acid	[M-H]-	253.217	1.02086		0.868699		0.11372		0.6153		++	+++	+
	PE(16:0/18:3(9Z,12Z,15Z)	[M-H]-	712.492	-		2.68636		-		0.0566		-	++++	-
	PE (36:6)	[M-H]-	734.477	-		0.208588		-		0.1963		-	+++	-
	PI(16:1(9Z)/18:2(9Z,12Z)	[M-H]-	831.503	-	b	3.21111	a	0.0292981	b	*		-	++++	+
	PI (36:6)	[M-H]-	853.487	-		0.263898		-		*		-	+++	-
	PA (36:6)	[M-H]-	691.434	-		0.0501712		-		0.1313		-	++	-
	PI(3)P(16:1(9Z)/18:2(9Z,12Z))	[M-H]-	911.469	0.00548638		-		-		0.2667		+	-	-
	PS(16:1(9Z)/18:2(9Z,12Z))	[M-H]-	756.482	-		0.0325692		-		0.5246		-	+	-
	CDP-DAG(16:1(9Z)/18:2(9Z,12Z))	[M-H]-	958.496	-		0.0190395		-		0.5246		-	+	-
	Phosphatidic acid (PA)(DAG)(16:1(9Z)/18:2(9Z,12Z))	[M-H]-	669.45	-	b	0.304882	a	0.0167862	b	**		-	++++	+
	Cytidine diphosphate (CDP)	[M-H]-	402.011	-		0.00488915		-		0.3257		-	+	-
	CDP-ethanolamine	[M-H]-	445.053	-		0.003		-		0.5246		-	+	-
	Phosphocholine	[M-H]-	182.059	-		0.0702346		0.037224		0.224		-	+++	+
	Glycerol 3-phosphate	[M-H]-	171.006	0.00282834	b	0.62789	a	0.0634708	b	***		+	++++	++
	Arachidonic Acid (peroxide free)	[M-H]-	303.233	-		0.00146		-		0.5246		-	+	-
Plant hormons	Gibberellin A3	[M-H]-	345.134	-		0.18248		-		0.3017		-	++	-
	trans-Zeatin	[M-H]-	218.105	0.15029		0.322815		0.0161706		0.248		+++	++	+
	Kinetin	[M-H]-	214.073	-		0.0388357		-		*		-	++	-
	Salicylic acid	[M-H]-	137.024	0.00538654		0.0690113		0.0137224		0.225		++	++	+
	1-Aminocyclopropane-1-carboxylic acid(ACC)	[M-H]-	100.04	-		0.0321426		-		0.1175		-	++	-
	methyl jasmonate	[M-H]-	223.134	-		0.000299547		-		0.5246		-	+	-
	Jasmonic acid	[M-H]-	209.118	0.0028949		-		-		0.2667		+	-	-
Jasmonic acid and Salicylic acid biosynthesis	Salicylic acid beta-D-glucoside	[M-H]-	299.077	-		0.131976		0.281506		0.1407		-	++	++++
	Salicylic acid beta-D-glucoside	[M-H]-	335.054	0.00450806	b	-	b	0.312386	a	**		+	-	++++
	(9R,13R)-12-oxo-phytodienoic acid (OPDA)	[M-H]-	291.197	-		0.00665602		-		0.4379		-	+	-
	(1R,2R)-4-oxo-5-pentyl-2-cyclopentene-1-octanoic acid (OPC-8)	[M-H]-	293.212	-		0.00133925		-		0.5246		-	+	-
	Isopentenyl pyrophosphate	[M-H]-	244.999	-		0.00972768		-		0.2596		-	+	-
Glucosinolate	Glucoiberin ?	[M-H]-	422.026	-		0.0043713		-		0.5246		-	+	-
	Glucoraphanin ?	[M-H]-	436.041	-		-		-		0.5246		-	-	-
	Glucoalyssin ?	[M-H]-	450.057	-		0.000416364		-		0.5246		-	+	-
	Glucohirsutin ?	[M-H]-	492.104	-		0.000476364		-		0.5246		-	+	-
	Saponarin ?	[M-H]-	593.151	-	b	0.0379314	a	0.355169	b	**		-	+	+++
	Rutin or Cyanin ?	[M-H]-	609.146	-	b	0.116057	ab	0.275722	a	*		-	+++	+++
	Primflaside	[M-H]-	727.173	-		-		0.0144595		0.1626		-	-	+
	Kaempferol 3-rutinoside-7-glucuronide?	[M-H]-	769.183	0.0789307		0.0917622		0.0844651		0.9788		+++	+++	+++
M+Hex	Malic acid+Hex	[M-H]-	313.078	0.0522916	b	1.2114	a	0.126724	b	***		++	++++	+++
	Ascorbate+Hex	[M-H]-	355.088	0.00858295	ab	0.0814917	a	0.00341442	b	*		+	+++	+
	Phosphoric acid+Hex	[M-H]-	277.033	0.156204	b	13.3975	a	0.0142948	b	***		+++	++++	+
	Succinic acid+Hex	[M-H]-	297.083	0.00228967	b	0.744162	a	0.00671358	b	***		++	++++	+
	Proline+Hex	[M-H]-	294.119	5.05937	b	32.9656	a	-	b	**		++++	++++	-
	Cysteine+Hex	[M-H]-	300.076	-		-		-				-	-	-
	Asparatic acid+Hex	[M-H]-	312.094	0.0177301	b	1.08581	a	-	b	**		++	++++	-
	Ascorbic acid+Hex	[M-H]-	355.088	0.00858295	ab	0.0814917	a	0.00341442	b	*		+	+++	+
	Glutamic acid+Hex	[M-H]-	326.109	0.0758068		0.679825		-		0.1724		+++	++++	-
	Sulfuric acid+Hex	[M-H]-	277.023	-		0.0912591		-		0.5219		-	+	-
M+Hex2	Malic acid+Hex2	[M-H]-	475.13	0.0232851	b	5.29862	a	1.64648	b	**		+	++++	++++
	Phosphoric acid+Hex2	[M-H]-	439.086	1.14508	b	34.3013	a	0.154815	b	***		++++	++++	++
	Succinic acid+Hex2	[M-H]-	459.136	0.0241135	b	1.13736	a	0.0691561	b	***		++	++++	++
	Ascorbic acid+Hex2	[M-H]-	517.141	3.01184	a	0.861731	b	0.0633541	c	***		++++	++++	++
	Proline+Hex2	[M-H]-	456.172	11.4553	b	38.9093	a	0.0172185	b	**		++++	++++	+
	Glutamic acid+Hex2	[M-H]-	488.162	1.34913		2.05127		0.113187		0.2099		++++	++++	++
	Asparatic acid+Hex2	[M-H]-	474.147	0.990005	b	5.50599	a	0.00552152	b	**		++++	++++	+
	HexP+Hex2	[M-H]-	601.139	0.00190668	b	4.05703	a	0.0143961	b	***		+	++++	+
	Serine+Hex2	[M-H]-	446.152	0.0221463		0.444762		0.147559		0.0849		++	++++	++
	Glutathione+Hex2	[M-H]-	648.193	0.108075	ab	0.283475	a	-	b	*		++++	++++	-

## Sheet: Table S2
Table S2. The lag times between pollen capture and pollen exudation or Roly-poly toy motion are shown. Data are the mean±SE of 26-29 individual pollen grains collected from at least three plants. Each parenthesis shows the range from the minimum to the maximum.
Lag time between pollen capture and pollen exudation	Lag time between pollen capture and Roly-poly toy motion
s	s
19.3±8.7	23.1±4.3
(8-44)	(22-126)
